# Supplementary material
Source: PubMed Central journal article supplement (PMC3830692)
Supplement: NIHMS503530-supplement-supplement_1.pdf [file NIHMS503530-supplement-supplement_1.pdf]

**Supplemental Table 1. Opioid, benzodiazepine, neuromuscular blockade, NSAID, and steroid drug conversion factors**

| <b>Opioid Drugs</b>           | <b>Equivalent Dose</b> |
|-------------------------------|------------------------|
| IV morphine                   | 1 mg                   |
| IV fentanyl                   | 0.01 mg                |
| IV hydromorphone              | 0.15 mg                |
| Oral oxycodone                | 3 mg                   |
| IV nalbuphine                 | 1 mg                   |
| Oral codeine                  | 20 mg                  |
| <b>Benzodiazepines</b>        | <b>Equivalent Dose</b> |
| IV midazolam                  | 1 mg                   |
| IV lorazepam                  | 0.5 mg                 |
| <b>Neuromuscular Blockers</b> | <b>Equivalent Dose</b> |
| IV vecuronium                 | 1 mg                   |
| IV cisatracurium              | 1 mg                   |
| <b>NSAIDs</b>                 | <b>Equivalent Dose</b> |
| IV ketorolac                  | 1 mg                   |
| Oral ibuprofen                | 20 mg                  |
| Oral naproxen                 | 45 mg                  |
| Oral aspirin                  | 7 mg                   |
| <b>Steroids</b>               | <b>Equivalent Dose</b> |
| IV hydrocortisone             | 1 mg                   |
| IV dexamethasone              | 0.025 mg               |
| IV methylprednisolone         | 0.20 mg                |
| Oral prednisone               | 0.20 mg                |
| Oral prednisolone             | 0.20 mg                |

**Supplemental Table 2. Subgroup demographics**

|                                                                                                                                                                  | Infants                   |                           | Children                    |                            |
|------------------------------------------------------------------------------------------------------------------------------------------------------------------|---------------------------|---------------------------|-----------------------------|----------------------------|
|                                                                                                                                                                  | No Down Syndrome (N=50)   | Down Syndrome (N=33)      | No Down Syndrome (N=27)     | Down Syndrome (N=11)       |
| Age (months) <sup>a</sup>                                                                                                                                        | 5.0 ± 2.2<br>(0.4 – 11.5) | 4.8 ± 2.4<br>(0.2 – 10.4) | 90 ± 64<br>(14 – 207)       | 53 ± 33<br>(12 – 103)      |
| Male <sup>b</sup>                                                                                                                                                | 30 (60%)                  | 15 (45%)                  | 13 (48%)                    | 6 (55%)                    |
| Weight (kg) <sup>a</sup>                                                                                                                                         | 6.0 ± 1.2<br>(3.1 – 8.1)  | 5.2 ± 1.6<br>(2.2 – 9.1)  | 31.5 ± 24.8<br>(8.6 – 96.9) | 14.1 ± 5.0<br>(7.0 – 21.7) |
| Primary Diagnosis <sup>b</sup>                                                                                                                                   |                           |                           |                             |                            |
| AVSD                                                                                                                                                             | 6 (12%)                   | 25 (76%)                  | 6 (22%)                     | 4 (36%)                    |
| Tetralogy of Fallot                                                                                                                                              | 31 (62%)                  | 1 (3%)                    | 4 (15%)                     | 1 (9%)                     |
| Ventricular Septal Defect                                                                                                                                        | 12 (24%)                  | 6 (18%)                   | 5 (19%)                     | 1 (9%)                     |
| Atrial Septal Defect                                                                                                                                             | 0 (0%)                    | 0 (0%)                    | 8 (30%)                     | 3 (27%)                    |
| Other <sup>c</sup>                                                                                                                                               | 1 (2%)                    | 1 (3%)                    | 4 (15%)                     | 2 (18%)                    |
| Bypass Time (min) <sup>a</sup>                                                                                                                                   | 101 ± 25<br>(38 – 171)    | 101 ± 42<br>(0 – 178)     | 94 ± 51<br>(0 – 215)        | 100 ± 52<br>(0 – 212)      |
| Creatinine (mg/dL) <sup>a</sup>                                                                                                                                  | 0.5 ± 0.1<br>(0.3 – 0.9)  | 0.6 ± 0.1<br>(0.3 – 0.9)  | 0.7 ± 0.3<br>(0.4 – 1.8)    | 0.6 ± 0.1<br>(0.4 – 0.81)  |
| Peak Pain Score in first 24 hours <sup>a</sup>                                                                                                                   | 4 ± 3<br>(0 – 10)         | 4 ± 3<br>(0 – 10)         | 5 ± 3<br>(0 – 10)           | 4 ± 2<br>(0 – 8)           |
| Mean Peak Pain Score in first 96 hours <sup>a</sup>                                                                                                              | 5 ± 2<br>(0 – 10)         | 4 ± 2<br>(0 – 8)          | 5 ± 2<br>(1 – 10)           | 4 ± 1<br>(1 – 6)           |
| Time to Extubation (days) <sup>a</sup>                                                                                                                           | 1.4 ± 1.5<br>(0 – 6)      | 1.9 ± 2.9<br>(0 – 14)     | 0.3 ± 1.0<br>(0 – 5)        | 0.5 ± 0.7<br>(0 – 2)       |
| <sup>a</sup> Mean ± SD (Min - Max)<br><sup>b</sup> N (Column %)<br><sup>c</sup> Other includes Mitral Valve Stenosis, Vascular Rings, and Aortic Arch Hypoplasia |                           |                           |                             |                            |

**Supplemental Table 3. Opioid agents administered**

| <b>Opioid Drugs</b>        | <b>Patients Exposed in First 24 Hours</b> | <b>Patients exposed in First 96 Hours</b> |
|----------------------------|-------------------------------------------|-------------------------------------------|
| Fentanyl Infusion          | 55                                        | 56                                        |
| Intermittent Fentanyl      | 104                                       | 107                                       |
| Any Fentanyl               | 109                                       | 109                                       |
| Intermittent Hydromorphone | 1                                         | 6                                         |
| Morphine Infusion          | 7                                         | 8                                         |
| Intermittent Morphine      | 88                                        | 111                                       |
| Any Morphine               | 90                                        | 111                                       |
| Nalbuphine                 | 0                                         | 1                                         |
| Oral Codeine               | 0                                         | 4                                         |
| Oral Oxycodone             | 26                                        | 85                                        |

**Supplemental Table 4. Ratios of geometric means for linear regression with dichotomous medication covariates**

|                                                                                                                                                                                                                                                                                                          | First 24 Hours <sup>a</sup> | First 96 Hours <sup>a</sup> |
|----------------------------------------------------------------------------------------------------------------------------------------------------------------------------------------------------------------------------------------------------------------------------------------------------------|-----------------------------|-----------------------------|
| <b>Age (years)</b>                                                                                                                                                                                                                                                                                       | <b>0.88 (0.84 – 0.92)</b>   | <b>0.88 (0.83 – 0.92)</b>   |
| Gender                                                                                                                                                                                                                                                                                                   | 0.87 (0.64 – 1.20)          | 1.02 (0.73 – 1.41)          |
| Down Syndrome Status                                                                                                                                                                                                                                                                                     | 1.14 (0.81 – 1.61)          | 0.96 (0.67 – 1.37)          |
| <b>Bypass Time (quarter hours)</b>                                                                                                                                                                                                                                                                       | <b>1.15 (1.08 – 1.22)</b>   | <b>1.16 (1.08 – 1.24)</b>   |
| Pain Score                                                                                                                                                                                                                                                                                               | 0.95 (0.89 – 1.02)          | 0.95 (0.87 – 1.04)          |
| Creatinine (mg/dL)                                                                                                                                                                                                                                                                                       | 1.28 (0.42 – 3.88)          | 2.02 (0.65 – 6.22)          |
| <b>Benzodiazepine Exposure</b>                                                                                                                                                                                                                                                                           | <b>2.07 (1.47 – 2.91)</b>   | <b>2.07 (1.42 – 3.04)</b>   |
| Acetaminophen Exposure                                                                                                                                                                                                                                                                                   | 1.03 (0.70 – 1.50)          | 0.85 (0.48 – 1.51)          |
| <b>Neuromuscular Blocker Exposure</b>                                                                                                                                                                                                                                                                    | <b>1.98 (1.24 – 3.16)</b>   | <b>2.24 (1.38 – 3.62)</b>   |
| Dexmedetomidine Exposure                                                                                                                                                                                                                                                                                 | 0.74 (0.53 – 1.03)          | <b>0.71 (0.51 – 0.99)</b>   |
| <sup>a</sup> Ratios of geometric means (95% confidence interval).<br>Covariates with significant correlation to the outcome of cumulative mg/kg opioid dose are in bold. Models: 24 hours $R^2 = 0.54$ , $F(10, 109) = 14.97$ , $P < 0.001$ ; 96 hours $R^2 = 0.59$ , $F(10, 105) = 14.95$ , $P < 0.001$ |                             |                             |

**Supplemental Table 5. Effect of Down syndrome on post-operative opioid dose among infants (< 1 year old) and children (> 1 year old)**

|                                                                                                      | 24 hours                |                      | 96 hours                |                      |
|------------------------------------------------------------------------------------------------------|-------------------------|----------------------|-------------------------|----------------------|
| <b>Infants</b>                                                                                       | No Down Syndrome (N=50) | Down Syndrome (N=33) | No Down Syndrome (N=50) | Down Syndrome (N=33) |
| Cumulative opioid (mg/kg) Median (IQR)                                                               | 4.0 (2.1 – 8.8)         | 4.3 (1.3 – 8.5)      | 5.1 (2.6 – 12.1)        | 5.1 (2.1 – 13.4)     |
| Differences of Medians (95% CI)                                                                      | -0.36 (-1.82 to +1.39)  |                      | -0.17 (-2.06 to +2.29)  |                      |
| Unadjusted P-value <sup>a</sup>                                                                      | 0.58                    |                      | 0.81                    |                      |
| Adjusted P-value <sup>b</sup>                                                                        | 0.97                    |                      | 0.85                    |                      |
| <b>Children</b>                                                                                      | No Down Syndrome (N=27) | Down Syndrome (N=11) | No Down Syndrome (N=27) | Down Syndrome (N=11) |
| Cumulative opioid (mg/kg) Median (IQR)                                                               | 0.6 (0.3 – 1.1)         | 1.4 (0.5 – 4.6)      | 0.9 (0.7 – 1.4)         | 1.5 (0.7 – 6.0)      |
| Differences of Medians (95% CI)                                                                      | +0.47 (-0.02 to +1.39)  |                      | +0.45 (-0.18 to +1.77)  |                      |
| Unadjusted P-value <sup>a</sup>                                                                      | 0.07                    |                      | 0.19                    |                      |
| Adjusted P-value <sup>b</sup>                                                                        | 0.19                    |                      | 0.13                    |                      |
| <sup>a</sup> Wilcoxon Rank-Sum test                                                                  |                         |                      |                         |                      |
| <sup>b</sup> For Down Syndrome in linear regression modeling, adjusting only for age and bypass time |                         |                      |                         |                      |
